# Supplementary material for: A Comparison of Two Methods for Quantifying Soil Organic Carbon of Alpine Grasslands on the Tibetan Plateau
Source: PubMed Central journal article supplement (PMC4422439; doi:10.1371/journal.pone.0126372), 2015-05-06
Supplement: pone.0126372.s001.pdf [file pone.0126372.s001.pdf]

**S1 Table.** Description of 36 sites across the Tibetan Plateau grasslands where 712 soil samples were collected. Data for latitude, longitude and altitude were obtained with Magellan GPS Field PROV (Magellan System Corporation, San Dimas, CA, USA). GSCC, Genetic Soil Classification of China; WRB, World Reference Base for soil resources.

| Site | Longitude<br>(° E) | Latitude<br>(° N) | Altitude<br>(m) | Vegetation type | Soil type-GSCC      | Soil type-WRB |
|------|--------------------|-------------------|-----------------|-----------------|---------------------|---------------|
| 1    | 100°53.432'        | 36°19.221'        | 3282            | alpine steppe   | Cold calcic soils   | Cambisols     |
| 2    | 100°27.422'        | 36°07.280'        | 2938            | alpine steppe   | Castanozems         | Kastanozems   |
| 3    | 100°13.207'        | 35°59.973'        | 3080            | alpine steppe   | Castanozems         | Kastanozems   |
| 4    | 100°13.498'        | 35°45.724'        | 3193            | alpine steppe   | Castanozems         | Kastanozems   |
| 5    | 100°55.751'        | 35°21.083'        | 3366            | alpine steppe   | Chernozems          | Chernozems    |
| 6    | 100°49.393'        | 34°51.414'        | 3663            | alpine meadow   | Felty soils         | Cambisols     |
| 7    | 100°13.176'        | 34°32.108'        | 3728            | alpine meadow   | Felty soils         | Cambisols     |
| 8    | 98°34.592'         | 34°59.056'        | 4305            | alpine steppe   | Frigid calcic soils | Calcisols     |
| 9    | 98°27.071'         | 34°51.325'        | 4230            | alpine steppe   | Frigid calcic soils | Calcisols     |
| 10   | 96°55.205'         | 33°01.548'        | 3825            | alpine meadow   | Dark felty soils    | Cambisols     |
| 11   | 96°23.657'         | 32°00.170'        | 4177            | alpine meadow   | Dark felty soils    | Cambisols     |
| 12   | 95°42.232'         | 33°56.836'        | 4152            | alpine meadow   | Meadow soils        | Cambisols     |
| 13   | 96°22.252'         | 33°58.190'        | 4224            | alpine meadow   | Meadow soils        | Cambisols     |
| 14   | 96°12.235'         | 34°06.083'        | 4366            | alpine meadow   | Meadow soils        | Cambisols     |
| 15   | 98°15.121'         | 34°52.502'        | 4243            | alpine steppe   | Frigid calcic soils | Calcisols     |
| 16   | 101°01.306'        | 36°51.842'        | 3066            | alpine steppe   | Castanozems         | Kastanozems   |
| 17   | 100°55.340'        | 36°58.825'        | 3130            | alpine steppe   | Castanozems         | Kastanozems   |
| 18   | 99°34.223'         | 37°08.267'        | 3241            | alpine steppe   | Meadow soils        | Cambisols     |
| 19   | 98°54.732'         | 36°56.347'        | 3297            | alpine steppe   | Cold calcic soils   | Cambisols     |

|    |            |            |      |               |                         |           |
|----|------------|------------|------|---------------|-------------------------|-----------|
| 20 | 98°23.293' | 37°16.851' | 3425 | alpine steppe | Cold brown calcic soils | Cambisols |
| 21 | 94°16.972' | 35°42.446' | 4374 | alpine meadow | Frigid frozen soils     | Leptosols |
| 22 | 93°51.934' | 35°30.723' | 4598 | alpine steppe | Frigid calcic soils     | Calcisols |
| 23 | 93°19.314' | 35°19.557' | 4539 | alpine meadow | Frigid calcic soils     | Calcisols |
| 24 | 93°02.413' | 35°07.700' | 4733 | alpine steppe | Frigid calcic soils     | Calcisols |
| 25 | 92°56.901' | 34°56.520' | 4555 | alpine steppe | Frigid calcic soils     | Calcisols |
| 26 | 92°37.389' | 34°22.662' | 4625 | alpine steppe | Frigid calcic soils     | Calcisols |
| 27 | 92°21.163' | 33°57.198' | 4619 | alpine meadow | Frigid calcic soils     | Calcisols |
| 28 | 92°06.048' | 33°43.622' | 4697 | alpine steppe | Frigid calcic soils     | Calcisols |
| 29 | 91°40.592' | 32°11.645' | 4632 | alpine meadow | Felty soils             | Cambisols |
| 30 | 91°20.024' | 31°30.287' | 4664 | alpine meadow | Felty soils             | Cambisols |
| 31 | 91°04.004' | 31°29.796' | 4608 | alpine steppe | Frigid calcic soils     | Calcisols |
| 32 | 92°52.145' | 31°49.888' | 4284 | alpine meadow | Felty soils             | Cambisols |
| 33 | 91°41.109' | 31°04.469' | 4702 | alpine meadow | Felty soils             | Cambisols |
| 34 | 91°32.196' | 30°37.291' | 4542 | alpine meadow | Felty soils             | Cambisols |
| 35 | 91°03.607' | 30°27.007' | 4256 | alpine meadow | Frigid calcic soils     | Calcisols |
| 36 | 99°18.567' | 36°42.040' | 3137 | alpine steppe | Cold brown calcic soils | Cambisols |

---
