# Supplementary material for: A Comparison of Two Methods for Quantifying Soil Organic Carbon of Alpine Grasslands on the Tibetan Plateau
Source: PubMed Central journal article supplement (PMC4422439; doi:10.1371/journal.pone.0126372), 2015-05-06
Supplement: pone.0126372.s002.pdf [file pone.0126372.s002.pdf]

**S2 Table.** Regressional relationships of SOC and STC determined between by the elemental analyzer and by the modified Walkley-Black (MWB) method in 5 soil types (according to the WRB, World Reference Base for soil resources) on the Tibetan Plateau using a linear regression passing through the origin.  $SOC_{CNS}$ , the difference between STC and SIC;  $SOC_{MWB}$ , SOC determined by the MWB method.

| Soil type   | n   | $SOC_{CNS}$ vs. $SOC_{MWB}$ |       |        | $SOC_{CNS}$ vs. STC |       |        |
|-------------|-----|-----------------------------|-------|--------|---------------------|-------|--------|
|             |     | Slope                       | $R^2$ | $P$    | Slope               | $R^2$ | $P$    |
| Cambisols   | 332 | 1.079                       | 0.972 | <0.001 | 0.878               | 0.959 | <0.001 |
| Leptosols   | 20  | 1.091                       | 0.986 | <0.001 | 0.769               | 0.973 | <0.001 |
| Kastanozems | 100 | 1.106                       | 0.980 | <0.001 | 0.802               | 0.970 | <0.001 |
| Chernozems  | 20  | 1.165                       | 0.975 | <0.001 | 0.715               | 0.982 | <0.001 |
| Calcisols   | 240 | 1.215                       | 0.983 | <0.001 | 0.672               | 0.913 | <0.001 |
